1  
2  
3  
4  
5  
6  
7  
8  
9  
10  
11  
12  
13  
14  
15  
16  
17  
18  
19

## **Network Structure and Social Complexity in Primates**

**R.I.M. Dunbar**

Department of Experimental Psychology

University of Oxford

South Parks Road

Oxford OX1 3UD, UK

and

Department of Computer Science

Aalto University

FI-00076 Espoo, Finland

[email: [robin.dunbar@psy.ox.ac.uk](mailto:robin.dunbar@psy.ox.ac.uk)]

20

## Abstract

21 Primates use social grooming to create and maintain coalitions. Because of this, individuals  
22 focus their time on a small number of individuals, and this means that in many cases group  
23 networks are not fully connected. I use data on primate grooming networks to show that three  
24 different social grades can be differentiated in terms of network structuring. These grades  
25 seem to arise from a glass ceiling imposed on group size by limits on the time available for  
26 social grooming. It seems that certain genera have managed to circumvent this constraint by a  
27 phase shift in the behavioural and cognitive mechanisms that underpin social relationships in  
28 a way that allows a form of multilevel sociality based on weak and strong ties not unlike  
29 those found in human social networks.

30

31

32

33 **Key words:** social networks, grooming, multilevel sociality, time budgets, cognition

34

## 35 **Introduction**

36           In primates, social grooming is the principal process by which relationships are built  
37 up and serviced (Dunbar & Shultz 2010; Massen et al. 2010; Silk et al. 2010a,b). Although  
38 time devoted to grooming increases linearly with group size (Dunbar 1991; Lehmann et al.  
39 2007; Dunbar & Lehmann 2013), this does not mean that individuals groom with every other  
40 member of the group; rather, it is a consequence of the fact that individuals choose to invest  
41 disproportionately in a small number of core relationships (Dunbar 1980; Duboscq et al.  
42 2016), probably so as to ensure their functionality as coalitions (Dunbar 2012). In both  
43 primates (Dunbar 1980) and humans (Roberts & Dunbar 2011), the quality of a relationship  
44 is determined by the amount of time an individual invests in it (in the primate case, by  
45 grooming with its partner): grooming partners are more likely to come to each other's aid in  
46 altercations (Dunbar 1980) and to alert when a partner gives fear screams (Seyfarth &  
47 Cheney 1984). More importantly, these relationships demonstrably influence female stress  
48 levels, fecundity and fitness in both primates (Silk et al. 2003, 2010a,b; Wittig et al. 2008)  
49 and equids (Cameron et al. 2009). If grooming relationships are the basis of social bonding in  
50 primates (Dunbar & Shultz 2010; Dunbar et al. 2009; Silk et al. 2010b), this raises questions  
51 about how group cohesion and stability are engineered in social groups that greatly exceed an  
52 individual's capacity to groom others (Dunbar 2012). This seems to have been a question  
53 that, so far, no one has thought of asking.

54           I use comparative data on grooming networks in a taxonomically wide set of primates  
55 to determine how social structure varies with group size. I focus explicitly on grooming  
56 relationships, rather than affiliative behaviours like proximity that some recent studies (e.g.  
57 Pasquaretta et al. 2014) have used because grooming is the central engine in building  
58 relationships for primates: grooming triggers the release of endorphins in the brain in both  
59 primates (Fabre-Nys et al. 1982; Keverne et al. 1989; Martel et al. 1993) and humans

60 (Nummenmaa et al. 2016), and endorphins are central to the creation and management of  
61 affiliative relationships (Panksepp 1999; Depue & Morrone-Strupinsky 2005; Dunbar 2010;  
62 Machin & Dunbar 2011; Pearce et al. 2017). Proximity and huddling merely imply tolerance  
63 (a consequence), whereas grooming, and especially its reciprocation, implies something  
64 about active engagement and commitment to another individual (a mechanism).

65 I focus on two indices of group social structure: the grooming clique (the number of  
66 other adults that an individual grooms with on a regular basis – in other words, its core  
67 coalition partners) and the grooming network (the number of individuals linked in a  
68 continuous chain of such relationships). The first tells us something about the social skills of  
69 an individual monkey (how many relationships it can keep functional at the same time). The  
70 second tells us something about the structural stability of a social group: groups that are split  
71 into several weakly connected networks may be more likely to fission when the ecological  
72 and social costs of group-living become intolerable (Dunbar et al. 2009).

73 I first examine the relationship between these two indices to determine how grooming  
74 clique size relates to network size and how network size relates to group size in order to  
75 explore the structural properties of groups. In both cases, we are interested in whether two  
76 indices form a single monotonic functional relationship or a set of separate but parallel  
77 grades. A single relationship in both cases tells us that these indices form a simple fractal  
78 pattern in which one layer scaffolds the next; living in large groups is thus a consequence of  
79 being able to manage more grooming relationships in the base layer, and nothing more. If the  
80 relationship between two indices also involves grades, such that there are two or more  
81 monotonic relationships involved, this would imply that some species are able to maintain a  
82 higher order grouping (an extended network) without necessarily having to change their  
83 lower level grouping (grooming clique size) proportionately; this implies an ability to  
84 manage two different kinds of relationships (weak and strong) simultaneously without

85 necessarily having to invest equally in all of them. If so, we will want to know whether these  
86 grades coincide with any obvious correlated change in grooming behaviour or cognition. For  
87 present purposes, I will use neocortex volume and a direct measure of executive function  
88 competence as relevant indices for this.

89

## 90 **Methods**

91 Data on the frequency of social grooming among adults are taken from Kudo &  
92 Dunbar (2001), still the most comprehensive grooming network dataset available,  
93 supplemented by three more recent studies. Pair-living species are excluded, since grooming  
94 networks are meaningless when there are only two adults. In total, 101 social groups drawn  
95 from 34 species are included in the sample, a larger and broader coverage than any previous  
96 analysis has used. The grooming data for each group are cast in a triangular matrix and used  
97 to calculate the two structural indices (grooming clique size for each individual and the mean  
98 size of all grooming networks in the group). In the network analysis literature, these indices  
99 are conventionally referred to as the *degree* and *n-clique*, respectively, but I will use the  
100 terms grooming clique and network here since they are more meaningful.

101 An important issue in network analysis is that not all relationships are of equal value.  
102 This is obvious from an examination of the many sociograms and social networks published  
103 in the literature: any given individual only grooms regularly with a proportion of the other  
104 members of its group (among many others, see network graphs given by Kummer 1968;  
105 Dunbar & Dunbar 1975; Voekl & Kasper 2009; Crofoot et al. 2011; Pasquaretta et al. 2014;  
106 Duboscq et al. 2016). Conventionally, the human literature distinguishes between *weak* and  
107 *strong* ties (Granovetter 1973; Sutcliffe et al. 2012) for this reason. Casual relationships often  
108 have a high turnover through time (for primate examples, see Altmann 1980; Dunbar &  
109 Dunbar 1988; Duboscq et al. 2016), as is the case in human social networks (Saramäki et al.

110 2014; Roberts & Dunbar 2015). The inclusion of all social contacts typically inflates the  
111 degree and, in the limit, leads unhelpfully to a saturated network (everyone grooms with  
112 everyone else) (James et al. 2009). A common strategy is, therefore, to divide ties between  
113 stronger more meaningful ones and weaker more casual ones by using some criterion based  
114 on the frequency of interaction. For present purposes, I follow previous studies (Dunbar  
115 1984; Kudo & Dunbar 2001; Lehmann & Dunbar 2009a) and define a meaningful tie as one  
116 that accounts for at least 10% of an individual's total social (i.e. grooming) effort (for  
117 justification and details, see *ESM*). This sets an upper limit on grooming clique size at 10  
118 partners, but no species, or group, comes close to this. A tie that accounts for more than 10%  
119 of an individual's social effort identifies a relationship likely to elicit coalitionary support  
120 (Dunbar 1984). I use undirected matrices (i.e. the data do not distinguish the direction of  
121 grooming), mainly because close relationships should be those that are reciprocated (i.e. each  
122 partner should invest equally in the relationship).

123 For each group, the grooming clique size of every adult in the group was first  
124 determined and then averaged, and then these were in turn averaged across all groups of the  
125 same species. Similarly, the size of all independent (i.e. non-overlapping) continuous network  
126 chains (n-cliques) in a group were first determined, averaged for each group, and then  
127 averaged across groups of the same species. Grooming clique size is independent of the  
128 actual size of group that animals happen to be in (Fig. S2), mainly because clique size is  
129 constrained by the species' cognitive ability to handle relationships, and is thus characteristic  
130 of the species (Kudo & Dunbar 2001). Data on mean social group size for individual species  
131 are taken from (Campbell et al. 2008), the most recent comprehensive summary available,  
132 supplemented where necessary by more recent sources (see Table S1). Neocortex ratio, the  
133 best predictor of social group size (Dunbar & Shultz 2007) as well as of executive function  
134 cognition (Shultz & Dunbar 2010), is taken from Kudo & Dunbar (2001). Executive function

135 cognition score is the arcsin transform of the mean proportion of correct trials on eight  
136 standard executive function tasks, the data for which were compiled from the published  
137 literature by Shultz & Dunbar (2010). Data on percent of day devoted to social grooming are  
138 taken from Lehmann et al. (2007).

139 In primates, species of the same genus typically exhibit very similar cognitive abilities  
140 and behaviour. To avoid inflating significance levels through phylogenetic autocorrelation,  
141 both structural indices and group size were averaged across species of the same genus to give  
142 mean values for individual genera and all analyses were carried out at genus level. Using  
143 generic means usually minimises the impact of phylogenetic effects. However, a genus-level  
144 analysis is essential for a second, more important, reason: phylogenetic methods remove  
145 grade differences, especially when these grades do not correspond to taxonomic divisions.  
146 Grades that cut across phylogeny are the focus of this analysis, and for this reason a genus-  
147 level analysis of raw data is necessary. This reduces the original sample from 34 species to 21  
148 genera, although all results at genus level are also checked at species level (see *ESM*).

149

## 150 **Results**

### 151 *Between-species comparison*

152 Fig. 1 plots mean network size as a function of mean grooming clique size (number of  
153 principal grooming partners) for individual genera, and mean group size as a function of  
154 mean network size. There is a significant correlation in the case of network/cliue (Fig. 1a:  
155  $r=0.841$ ,  $p<0.001$ ,  $N=21$ ), with a scaling ratio that does not differ significantly from 3  
156 ( $t_{19}[b=3]=0.03$ ,  $p=0.979$  (cf. Hill et al. 2008), but not in the case of group/network (Fig. 1b:  
157  $r=0.303$ ,  $p=0.181$ ). However, a phylogenetic contrasts analysis (which removes the effect of  
158 grades) yields a highly significant relationship in the latter case (Fig. S3; contrasts in  
159 degree/cliue,  $r=0.827$ ,  $p=0.00008$ ; contrasts in group/network,  $r=0.675$ ,  $p=0.004$ ), providing

160 strong evidence that there is in fact an underlying relationship in this case too. The loss of  
161 significance when not controlling for phylogeny strongly implies that there is a grade effect.  
162 present Finally, values for individual species exhibit the same patterns, with similarly  
163 significant relationships in both cases (Fig. S4).

164 To explore this further, I examined residuals from the common RMA regression line  
165 in Fig. 1b. The residuals have an obviously trimodal distribution, unless one wants to  
166 consider a single outlier a grade in its own right (Fig. 2). A *k-means* cluster analysis of these  
167 residuals yields an optimal partition into three separate clusters ( $F_{2,18}=93.3$ ,  $p<0.0001$ ), with  
168 both lower and higher order clustering yielding much poorer goodness-of-fits. Taken  
169 together, the three grades have individual slopes that are significantly positive (Fisher's meta-  
170 analysis:  $\chi^2=22.65$ ,  $df=6$ ,  $p<0.001$ ), with intercepts for the two upper grades differing  
171 significantly from that for the lower grade ( $t_{12}=6.65$ ,  $p<0.0001$ ;  $t_{15}=4.92$ ,  $p=0.0002$ ) but not  
172 from each other ( $t_9=1.61$ ,  $p=0.129$ ), perhaps suggesting that the distinction between the upper  
173 and middle grades is less robust than that between them and the lower grade. A multiple  
174 regression of group size against network size with grade as a dummy variable yields a  
175 significant regression with a radically improved goodness of fit (with grades,  $r^2=0.919$  vs  
176  $r^2=0.092$  without grades; with grades,  $F_{2,18}=102.1$ ,  $p<0.00001$ ), and significant partial  
177 regressions for both network size ( $t_p=4.51$ ,  $p=0.0003$ ) and grade ( $t_p=13.56$ ,  $p<0.0001$ ).

178 The three grades in Fig. 1b include, left to right:

179 Upper grade: *Erythrocebus* [1], *Procolobus* [1], *Papio* [1,1], *Pan* [1,1]

180 Middle grade: *Chlorocebus* [1], *Saimiri* [1], *Sajapus* [1], *Ateles* [1], *Theropithecus* [1],

181 *Semnopithecus* [1], *Macaca* [1,1,1,0]

182 Lower grade: *Colobus* [0], *Propithecus* [0], *Alouatta* [1], *Indri* [0], *Callicebus* [0], *Eulemur*

183 [1], *Trachypithecus* [0,0],

184 *Cercopithecus* [0,0,0], *Cebus* [1], *Presbytis* [0], *Lemur* [1]



185           The network:clique ratios for individual species approximate 3, and do not differ  
186 across the three grades (Fig. 3a:  $F_{2,30}=0.69$ ,  $p=0.510$ ). However, the group:network ratios  
187 differ significantly across grades (Fig. 3b:  $F_{2,29}=15.3$ ,  $p<0.001$ ), with the three grades  
188 differing significantly from each other (Scheffé post hoc tests:  $p\leq 0.044$ ). Mean  
189 network:clique ratios are 2.71, 2.95 and 2.53, while mean group:network ratios are 2.31, 4.23  
190 and 7.02, respectively, for the three grades.

191

### 192 *Cognition, time budgets and social structure*

193           The three grades differ significantly in neocortex ratio (Fig. 4: means of  $1.78\pm 0.55$  vs  
194  $2.37\pm 0.16$  vs  $2.78\pm 0.43$ ;  $F_{2,18}=8.79$ ,  $p=0.002$ ). Post hoc tests confirm that the lower grade  
195 differs significantly from the other two grades (Scheffé tests:  $p=0.041$  and  $p=0.004$ ), but the  
196 two upper grades do not differ significantly from each other ( $p=0.343$ ). The three grades also  
197 differ significantly in executive function cognitive competences (Fig. 5:  $F_{2,15}=8.32$ ,  $p=0.004$ ),  
198 with the lower grade being significantly different from the two upper grades (Scheffé tests:  
199  $p=0.049$  and  $p=0.004$ ), but the two upper grades again not differing significantly ( $p=0.105$ ).

200           While there is, overall, a significant positive correlation between species mean group  
201 size and mean percent of the day devoted to social grooming (Fig. 6:  $F_{1,20}=7.47$ ,  $p=0.013$ ) (cf.  
202 Dunbar 1991; Lehmann et al. 2007; Dunbar & Lehmann 2013), the data in fact partition into  
203 two distinct grades with parallel slopes. However, this obscures a more complex relationship.  
204 A backwards stepwise multiple regression with mean species grooming time as the dependent  
205 variable and mean group size, mean network size, mean clique size and grade (as a  
206 dichotomous dummy variable: lower versus middle+upper) as independent variables yields a  
207 highly significant model ( $F_{3,18}=5.59$ ,  $p=0.006$ ) with a negative relationship with clique size  
208 ( $p=0.035$ ), a positive relationship with network size ( $p=0.005$ ), and a significant effect of  
209 grade ( $p=0.007$ ), and no effect due to group size (Table 1).

210

## 211 **Discussion**

212         The results suggest that group-living primates divide into at least two, possibly three,  
213 grades of sociality in terms of the relationship between grooming network size and group  
214 size. Species from the lower social grade are heavily restricted in the range of group sizes  
215 they can have, but the more social species are somehow able to maintain larger groups for a  
216 given grooming clique size. For many lower grade taxa, group size and network size are  
217 synonymous, but the two higher grades are able to maintain groups that are 4-6 times the size  
218 of their grooming networks. In other words, the groups of these species seem to contain a  
219 large number of effectively unconnected (or weakly connected) grooming networks that are  
220 likely to constitute potential fracture points for group fission. Nonetheless, even though the  
221 quality of a dyadic relationship is related to the amount of effort directly invested in it for  
222 both monkeys (Dunbar 1980; Seyfarth & Cheney 1984) and humans (Sutcliffe et al. 2012),  
223 upper grade species are seemingly able to maintain group cohesion without having to groom  
224 with everyone in the group, whereas lower grade species seemingly cannot.

225         Fig. 1a suggests that there is an upper limit at around five individuals that can be  
226 maintained as grooming partners. This is identical to the number of intimate social partners  
227 found in humans (mean $\approx$ 5: Sutcliffe et al. 2012; Burton-Chellew & Dunbar 2015). In  
228 primates, the grooming clique functions as the principal defence coalition: individuals in this  
229 category are more likely to come to each other's aid when one of them is challenged (Dunbar  
230 1980, 1984; Seyfarth & Cheney 1984). This set of grooming partners also provides the basis  
231 for an extended grooming network (or  $n$ -clique, the number of individuals that can be reached  
232 directly or indirectly through a continuous chain) that is three times larger, and this is true of  
233 all the genera in the sample. Hill et al. (2008) found a scaling ratio of  $\sim$ 3 for grouping levels  
234 in a sample of mammals (including three primate species) that live in multilevel societies,

235 and a similar layering with a scaling ratio of  $\sim 3$  has been widely documented in human social  
236 networks (Hill & Dunbar 2003; Zhou et al. 2005; Hamilton et al. 2007; Dunbar et al. 2015;  
237 MacCarron et al. 2016). The larger sample provided by this study however, suggests that  
238 there may be a distinction between lower grade taxa whose networks more or less correspond  
239 to their groups and higher grade taxa (those sampled by Hill et al. 2009) which have much  
240 higher group:network scaling ratios such that their groups consist of several weakly  
241 connected sub-networks.

242 These results suggest that upper grade taxa can somehow maintain temporal  
243 coherence between sub-groups that do not interact directly very often, whereas lower grade  
244 taxa cannot. It is noteworthy that the upper grade taxa differ from the middle grade mainly in  
245 the fact that all four of the upper grade genera either occupy terrestrial (and therefore  
246 predator-risky) habitats (Lehmann & Dunbar 2009b; Bettridge & Dunbar 2012) or typically  
247 experience unusually high predation risk, notably from chimpanzees (e.g. *Procolobus*:  
248 Stanford 1995). It seems that these species are either being pushed beyond their capacities in  
249 order to live where they do or have evolved additional cognitive capacities to cope with  
250 larger groups (as may be the case in baboons and chimpanzees).

251 The capacity to maintain social cohesion without grooming with everyone appears to  
252 depend on increased neocortex volume, and not phylogeny, and may thus depend on novel  
253 aspects of cognition. Indeed, in terms of executive function, there are correlated differences  
254 between the grades in cognitive ability. The grooming data (Fig. 6) suggest that while lower  
255 grade taxa simply increase grooming time to allow a larger clique (and hence group) size,  
256 taxa in the upper grades seem to trade off investment in their close allies (principal grooming  
257 partners) to allow time for more casual interactions with other members of their extended  
258 network in a way that probably gives these extended networks greater coherence and  
259 structural stability. However, upper grade taxa are also managing to do something else, and

260 that is to ensure that several other similar network subgroups remain within their group  
261 despite the stresses imposed by having more individuals in the group and despite not  
262 grooming with them. In part, this might be because individuals are able to acquire knowledge  
263 about third parties with whom they do not interact directly by observing them interacting  
264 with other members of the group, and later using this knowledge to infer, for example, where  
265 an individual sits in the wider dominance hierarchy (Bergman et al. 2003; Schino et al. 2006),  
266 whom they have alliances with (Datta 1999; Cheney & Seyfarth 1999) and, on the basis of  
267 observed reputation, how trustworthy they might be (Silk 1999; Russell et al. 2008).  
268 Although competences of this kind have often been documented in upper grade taxa,  
269 evidence for these capacities is, so far at least, largely absent from any lower grade genus.

270 As Fig. 4 suggests, the structural differences in the way these species' social groups  
271 are organised relate to the relative sizes of their brains, in particular the size of the neocortex,  
272 and Fig. 5 shows that there are correlated differences in cognitive ability, suggesting these  
273 may play an important role in facilitating the higher order competences that underpin the  
274 upper grade form(s) of sociality. (Note that these executive function competences have been  
275 shown to correlate with neocortex volume across primates, even when correcting for  
276 phylogenetic relationships: Shultz & Dunbar 2010.) The frontal lobes play a crucial role in  
277 managing social relationships, and hence in individual differences in personal ego-centric  
278 network size in both humans (Lewis et al. 2011; Powell et al. 2012; Kanai et al. 2012) and  
279 macaques (Sallet et al. 2013), as well as social cognition (such as the capacity to integrate  
280 others' perspectives with one's own: Powell et al. 2010, 2014). Brodman area 10 in the  
281 frontal pole of the neocortex, which is found *only* in anthropoid primates, seems to be crucial  
282 for allowing animals to engage in the kinds of advanced forms of executive function  
283 cognition (notably one-trial learning, causal reasoning, strategic comparisons and inhibition:  
284 Passingham & Wise 2012) that are likely to be essential for the management of complex

285 social relationships. It may be relevant that no non-primate mammals that lives in primate-  
286 like bonded (Silk et al. 2010a; Dunbar & Shultz 2010; Massen et al. 2010) social groups (e.g.  
287 equids, canids, tylopods, hyaenids) (Shultz & Dunbar 2010) has a mean group size that  
288 exceeds 30 animals; the only exceptions are elephants and delphinids, both of whom have  
289 neocortices in the cercopithecine primate range as well as primate-like multilevel social  
290 systems (Hill et al. 2008). Clearly, more data on the cognitive and social behaviour of other  
291 mammal and primate species are needed in order to explore this further.

292         The grooming data of Fig. 6 suggest (i) that animals adjust their grooming time  
293 commitments mainly to the size of their social networks, rather than group size as a whole,  
294 (ii) that proportionately more time is committed to grooming in those species where groups  
295 are multilevel-structured, and (iii) that they free off time to make this possible by reducing  
296 their investment in their core grooming partners (clique members). It seems that the limit on  
297 the number of grooming partners that an individual can have (its degree) is ultimately set by  
298 the amount of time it can afford to devote to social interaction, and this in turn is likely to be  
299 determined by the extent to which its diet imposes demands on foraging and resting time  
300 (Dunbar et al. 2009). The lower grade taxa differ from those in the upper grades by being  
301 more folivorous ( $35.5 \pm 26.9\%$  leaf in diet vs  $18.1 \pm 15.4\%$  for upper grade taxa; data in  
302 Korstjens et al. 2010). Species that depend on hindgut fermentation to extract nutrients from  
303 high-fibre leaf-based diets are obliged to devote significant amounts of time to resting in  
304 order to allow fermentation to occur because the heat generated by any form of activity  
305 suppresses the gut flora responsible for fermentation (van Soest 1982). This phenomenon is  
306 familiar in ruminants, who are obliged to lie down and rest when ruminating (van Soest  
307 1982). This severely limits the time available for social interaction in the more folivorous  
308 primates (Dunbar 1988; Korstjens & Dunbar 2008), and seems to be mainly responsible for  
309 their smaller, less structured groups.

310           A switch from a more leaf-based diet to a more fruit-based one has been shown to be  
311 responsible for the contrast in social group size between *Colobus* (a member of the lower  
312 grade, mean group size = 9.5; leaf = 59% of diet) and *Procolobus* (a member of the more  
313 intensely social upper grade, mean group size = 33.8; leaf = 46%): *Colobus* populations  
314 spend an average of 62.4% of their day resting, compared to 44.8% for *Procolobus*  
315 populations (Korstjens & Dunbar 2008), and thus have considerably less time available for  
316 social grooming, which in turn limits group size. Giving *Colobus* species a *Procolobus*-like  
317 diet allows them to live in groups as large as those found in *Procolobus*, and *vice versa*  
318 (Korstjens & Dunbar 2008). The issue, then, is that improvements in diet quality allow less  
319 time to be spent foraging, thereby freeing off time for social interaction (and hence bonding  
320 larger groups) as well as allowing the higher nutrient throughput needed for larger brains to  
321 be evolved to handle more complex relationships (Dunbar & Shultz 2017).

322           In sum, the apparent ability to support a larger group with less investment seems most  
323 likely to involve a phase shift in socio-cognitive competences, probably dependent on  
324 significant increases in brain size that allow novel behaviours (Shultz & Dunbar 2010). One  
325 way this might have been achieved is by enabling individuals to maintain several  
326 qualitatively different kinds of relationships at the same time in a way reminiscent of  
327 Granovetter's (1973) distinction between weak and strong ties in human networks. Whether  
328 primates as a whole represent just two or more than two such phase shifts remains to be  
329 investigated in more detail.

330

331

### 332 **Acknowledgments**

333 My research is supported by a European Research Council Advanced Investigator grant.

334

- 335 **Ethics statement:** this study did not require ethical approval.
- 336 **Data accessibility:** the data can be found in the ESM.
- 337 **Competing interests:** the author declares no competing interests.
- 338 **Authors' contributions:** The named author is the sole author.

339 **References**

- 354 Altmann, J (1980) Baboon Mothers and Infants. Cambridge MA: Harvard University Press.
- 355 Bergman TJ, Beehner JC, Cheney DL, Seyfarth RM (2003) Hierarchical classification by  
356 rank and kinship in baboons. *Science* 302:1234-1236.
- 357 Bettridge C, Dunbar RIM (2012). Predation as a determinant of minimum group size in  
358 baboons. *Folia Primat* 83:332-352.
- 359 Burton-Chellew, M. & Dunbar, RIM (2015) Romance and reproduction are socially costly.  
360 *Evol. Behav. Sci.* 9: 229–241
- 361 Cameron EZ, Setsaas TH, Linklater WL. 2009 Social bonds between unrelated females  
362 increase reproductive success in feral horses. *Proc. Natl Acad. Sci. USA* 106, 13 850–  
363 13 853.
- 364 Campbell CJ, Fuentes A, Mackinnon KC, Panger M, Bearder SK (2007) Primates in  
365 Perspective. Oxford University Press: Oxford.
- 366 Cheney DL, Seyfarth RM (1999) Recognition of other individuals' social relationships by  
367 female baboons. *Anim Behav* 58: 67–75.
- 368 Crofoot MC, Rubenstein DI, Maiva AS, Berger-Wolf TY (2011) Aggression, grooming and  
369 group-level cooperation in white-faced capuchins (*Cebus capucinus*): insights from  
370 social networks. *American Journal of Primatology* 73:821-833.
- 371 Datta S (1983) Relative power and the acquisition of rank. In: R.A. Hinde (ed.) Primate  
372 social relationships, pp. 103-12. Oxford: Blackwells.
- 373 Depue, R.A. & Morrone-Strupinsky, J.V. (2005). A neurobehavioral model of affiliative  
374 bonding: implications for conceptualizing a human trait of affiliation. *Behavioral and Brain*  
375 *Sciences* 28: 313-395
- 376 Duboscq J, Romano V, Sueur C, MacIntosh AJJ (2016) Network centrality and seasonality  
377 interact to predict lice load in a social primate. *Scientific Reports* 6:22095.



- 378 Dunbar RIM (1980). Determinants and evolutionary consequences of dominance among female  
379 gelada baboons. *Behav Ecol Sociobiol* 7: 253-265.
- 380 Dunbar RIM (1984) *Reproductive Decisions: An Economic Analysis of Gelada Baboon*  
381 *Social Strategies*. Princeton, NJ: Princeton University Press.
- 382 Dunbar RIM (1988) *Primate Social Systems*. London: Chapman & Hall & Ithaca: Cornell  
383 University Press.
- 384 Dunbar RIM (1991) Functional significance of social grooming in primates. *Folia Primat*  
385 57:121-131.
- 386 Dunbar RIM (2010) The social role of touch in humans and primates: behavioural function  
387 and neurobiological mechanisms. *Neurosci Biobehav Rev* 34: 260-268.
- 388 Dunbar, R.I.M. (2012). Bridging the bonding gap: the transition from primates to humans. *Phil.*  
389 *Trans. R. Soc. Lond.* 367B: 1837-1846.
- 390 Dunbar, R.I.M. & Dunbar, P. (1975). *Social Organisation of Gelada Baboons*. Basel: Karger.
- 391 Dunbar RIM, Dunbar P (1988) Maternal time budgets of gelada baboons. *Anim Behav* 36: 970-  
392 980.
- 393 Dunbar RIM, Lehmann J (2013). Grooming and social cohesion in primates: a comment on  
394 Grueter et al. *Evol Human Behav* 34: 53-455. Dunbar RIM, Shultz S (2010)  
395 Bondedness and sociality. *Behaviour* 147: 775-803.
- 396 Dunbar RIM, Shultz S (2007) Understanding primate brain evolution. *Phil Trans R Soc Lond*  
397 362B: 649-658.
- 398 Dunbar RIM, Shultz S (2010) Bondedness and sociality. *Behaviour* 147: 775-803.
- 399 Dunbar RIM, Shultz S (2017) Why are there so many different explanations for primate brain  
400 evolution. *Phil Trans R Soc Lond* 244B: 201602244.
- 401 Dunbar RIM, Korstjens AH, Lehmann J (2009) Time as an ecological constraint. *Biol Rev*  
402 84:413-429.

- 403 Dunbar RIM, Arnaboldi V, Conti M, Passarella A (2015) The structure of online social  
404 networks mirrors those in the offline world. *Social Networks* 43: 39-47.
- 405 Fabre-Nys C, Meller RE, Keverne EB (1982) Opiate antagonists stimulate affiliative  
406 behaviour in monkeys. *Pharmacol Biochem Behav* 16:653–659.
- 407 Granovetter M (1973) The strength of weak ties. *Amer J Sociol* 78:1360–1380.
- 408 Hamilton MJ, Milne BT, Walker RS, Burger O, Brown JH (2007) The complex structure of  
409 hunter – gatherer social networks. *Proc R Soc Lond* 274B: 2195–2202.
- 410 Hill RA, Dunbar RIM (2003) Social network size in humans. *Human Nature* 14: 53-72.
- 411 Hill RA, Bentley A, Dunbar RIM (2008) Network scaling reveals consistent fractal pattern in  
412 hierarchical mammalian societies. *Biol Letts* 4:748-751.
- 413 James R, Croft DP, Krause J (2009) Potential banana skins in animal social network analysis.  
414 *Behav Ecol Sociobiol* 63:989-997.
- 415 Kanai R, Bahrami B, Roylance R, Rees G (2012) Online social network size is reflected in  
416 human brain structure. *Proc R Soc Lond* 279B:1327-1334.
- 417 Keverne EB, Martensz ND, Tuite B (1989) Beta-endorphin concentrations in cerebrospinal  
418 fluid of monkeys are influenced by grooming relationships.  
419 *Psychoneuroendocrinology* 14:155–161.
- 420 Korstjens AH, Dunbar RIM (2008) Time constraints limit group sizes and distribution in red  
421 and black-and-white colobus monkeys. *Int J Primatol* 28:551-575.
- 422 Korstjens AH, Lehmann J, Dunbar RIM (2010) Resting time as an ecological constraint on  
423 primate biogeography. *Anim Behav* 79:361-374.
- 424 Kudo H, Dunbar RIM (2001) Neocortex size and social network size in primates. *Anim Behav*  
425 62:711-722.
- 426 Kummer, H. (1968). *Social Organisation of Hamadryas Baboons*. Basel: Karger.

- 427 Lehmann J, Dunbar RIM (2009a) Network cohesion, group size and neocortex size in female-  
428 bonded Old World primates. *Proc R Soc Lond* 276B:4417-4422.
- 429 Lehmann J, Dunbar RIM (2009b) Implications of body mass and predation for ape social  
430 system and biogeographical distribution. *Oikos* 118: 379-390.
- 431 Lehmann J, Korstjens AH, Dunbar RIM (2007) Group size, grooming and social cohesion in  
432 primates. *Anim Behav* 74:1617-1629.
- 433 Lewis PA, Rezaie R, Browne R, Roberts N, Dunbar RIM (2011) Ventromedial prefrontal  
434 volume predicts understanding of others and social network size. *NeuroImage*  
435 57:1624-1629.
- 436 MacCarron P, Kaski K, Dunbar RIM (2016) Calling Dunbar's numbers. *Social Networks*  
437 47:151–155.
- 438 Machin A, Dunbar RIM (2011) The brain opioid theory of social attachment: a review of the  
439 evidence. *Behaviour* 148: 985-1025.
- 440 Martel FL, Nevison CM, Rayment FD, Simpson MJ, Keverne EB (1993) Opioid receptor  
441 blockade reduces maternal affect and social grooming in rhesus  
442 monkeys. *Psychoneuroendocrinol* 18: 307-321.
- 443 Massen, J.J.M., Sterck, E.H.M. & de Vos, H. (2010). Close social associations in animals and  
444 humans: functions and mechanisms of friendship. *Behaviour* 147: 1379–1412.
- 445 Nummenmaa L, Tuominen L, Dunbar RIM, Hirvonen J, Manninen S, Arponen E, Machin A,  
446 Hari R, Jääskeläinen IP, Sams M (2016) Reinforcing social bonds by touching  
447 modulates endogenous  $\mu$ -opioid system activity in humans. *NeuroImage* 138: 242–  
448 247.
- 449 Panksepp, J. (1999). *Affective Neuroscience*. Oxford: Oxford University Press.
- 450 Pasquaretta C, Levé M, Claidière N, van de Waal E, Whiten A, MacIntosh AJJ, Pelé M,  
451 Bergstrom ML, Borgeaud C, Brosnan SF, Crofoot MC, Fedigan LM, Fichtel C,

- 452 Hopper LM, Marenco MC, Petit O, Schnoell AV, Polizzi de Sorrentino E, Thierry B,  
453 Tiddi B, Sueur C (2014) Social networks in primates: smart and tolerant species have  
454 more efficient networks. *Scientific Reports* 4: 7600
- 455 Passingham RE, Wise SP (2012) *The Neurobiology of the Prefrontal Cortex: Anatomy,*  
456 *Evolution and the Origin of Insight.* Oxford: Oxford University Press.
- 457 Powell J, Lewis PA, Dunbar RIM, García-Fiñana M, Roberts N (2010) Orbital prefrontal  
458 cortex volume correlates with social cognitive competence. *Neuropsychologia* 48:  
459 3554-3562.
- 460 Powell J, Lewis P, Roberts N, García-Fiñana M, Dunbar RIM (2012) Orbital prefrontal  
461 cortex volume predicts social network size: an imaging study of individual in humans.  
462 *Proc R Soc Lond* 279B:2157-2162.
- 463 Powell, J., Kemp, G., Dunbar, R.I.M., Roberts, N., Sluming, V. & García-Fiñana, M. (2014).  
464 Different association between intentionality competence and prefrontal volume in  
465 left- and right-handers. *Cortex* 54: 63-76.
- 466 Pearce E, Wlodarski R, Machin A, Dunbar RIM (2017) Variation in the  $\beta$ -endorphin,  
467 oxytocin and dopamine receptor genes is associated with different dimensions of  
468 human sociality. *PNAS* 000: 0000-0000.
- 469 Roberts SBG, Dunbar RIM (2011) Communication in social networks: effects of kinship,  
470 network size and emotional closeness. *Pers Rels* 18:439-452.
- 471 Roberts, S.B.G. & Dunbar, R.I.M. (2015). Managing relationship decay: network, gender,  
472 and contextual effects. *Human Nature* 26:426-450
- 473 Russell Y, Call J, Dunbar RIM (2008). Image scoring in great apes. *Behav Processes* 78:  
474 108-111.

- 475 Sallet J, Mars RB, Noonan MA, Neubert FX, Jbabdi S, O'Reilly JX, Filippini N, Thomas AG,  
476 Rushworth MFS (2013) The organization of dorsal prefrontal cortex in humans and  
477 macaques. *J Neurosci* 33:12255-12274.
- 478 Saramäki, J., Leicht, E., López, E., Roberts, S.B.G., Reed-Tsochas, F. & Dunbar, R.I.M.  
479 (2014). The persistence of social signatures in human communication. *PNAS* 111:  
480 942-947.
- 481 Schino, G., Tiddi, B. & Polizzi di Sorrentino E (2006) Simultaneous classification by rank and  
482 kinship in Japanese macaques. *Anim Behav* 71: 1069-1074.
- 483 Seyfarth RM, Cheney DL (1984) Grooming, alliances and reciprocal altruism in vervet  
484 monkeys. *Nature* 308: 541-543.
- 485 Shultz S, Dunbar RIM (2010) Species differences in executive function correlate with  
486 hippocampus volume and neocortex ratio across non-human primates. *J Comp*  
487 *Psychol* 124:252-260.
- 488 Silk J (1999) Male bonnet macaques use information about third-party rank relationships to  
489 recruit allies. *Anim Behav* 58: 45-51.
- 490 Silk JB, Beehner JC, Bergman TJ, Crockford C, Engh AL, Moscovice LR, Wittig RM,  
491 Seyfarth RM, Cheney DL (2010a) Female chacma baboons form strong, enduring and  
492 equitable social bonds. *Behav Ecol Sociobiol* 64:1733-1747.
- 493 Silk JB, Beehner JC, Bergman TJ, Crockford C, Engh AL, Moscovice LR, Wittig RM,  
494 Seyfarth RM, Cheney DL (2010b) Strong and consistent social bonds enhance the  
495 longevity of female baboons. *Curr Biol* 20:1359–1361.
- 496 van Soest PJ (1982) *Nutritional Ecology of Ruminants*. Ithaca NY: Cornell University Press.
- 497 Stanford CB (1995) The influence of chimpanzee predation on group size and anti-predator  
498 behaviour in red colobus monkeys. *Animal Behaviour* 49: 577-587.
- 499 Sutcliffe AJ, Dunbar RIM, Binder J, Arrow H (2012) Relationships and the social brain:

500           integrating psychological and evolutionary perspectives. *Brit J Psychol* 103:149-168.

501   Voekl B, Kasper C (2009) Social structure of primate interaction networks facilitates the

502           emergence of cooperation. *Biol Letts* 5: 462-464.

503   Wittig, R.M., Crockford, C., Lehmann, J., Whitten, P.L., Seyfarth, R.M. & Cheney, D.L.

504           (2008). Focused grooming networks and stress alleviation in wild female baboons.

505           *Hormones Behav.* 54, 170-177.

506   Zhou WX, Sornette D, Hill RA, Dunbar RIM (2005) Discrete hierarchical organization of

507           social group sizes. *Proc R Soc Lond* 272B: 439-444.

508

509

510

511

## Legends to Figures

512

513 Fig. 1. (a) Mean grooming network size plotted against mean grooming clique size and (b)  
514 mean group size plotted against  $\log_{10}$  mean grooming network size for individual  
515 primate genera. Symbols in (b) indicate genera assigned to the three distinct social  
516 grades. Although the statistical analysis of the slopes for individual grades are based  
517 on simple linear regression, the regression lines in (b) are plotted on the assumption  
518 that they are in fact power curves anchored on the origin.

519

520 Fig. 2. Distribution of residuals from the common regression line for the genera in Fig. 1(b).

521

522 Fig. 3. Mean ( $\pm 2$  se) (a) network:clique ratio and (b) group: network ratio for the three grades  
523 shown in Fig. 1b. The dashed line marks a scaling ratio of 3.

524

525 Fig. 4. Mean ( $\pm 2$  se) neocortex ratio for the three social grade shown in Fig. 1b.

526

527 Fig. 5. Mean ( $\pm 2$  se) executive function ability score for individual species in the three  
528 grades. Ability score is the arcsin transform of the proportion of correct trials on 8  
529 standard executive function tasks. Data from (8).

530

531 Fig. 6. Mean percentage of daytime devoted to social grooming by individual species,  
532 plotted against species mean social group size. Species are distinguished according to  
533 whether their genera are classed as upper grade (solid symbols) or lower grade (open  
534 symbols) in Fig. 1b. Regression lines are LSR regressions (solid line: upper grade;  
535 dashed line: lower grade).

536 Table 1. Best fit backward stepwise multiple regression analysis of percent time spent  
537 grooming as the dependent variable.

538

539

| 540 Variable     | Slope  | Standardized slope | t     | p     |
|------------------|--------|--------------------|-------|-------|
| 541              | -----  |                    |       |       |
| 542 Constant     | 0.469  |                    |       |       |
| 543 Clique size  | -4.218 | -0.830             | -2.28 | 0.035 |
| 544 Network size | 1.135  | 1.108              | 3.16  | 0.005 |
| 545 Grade*       | 5.609  | 1.835              | 3.06  | 0.007 |

---

546 Excluded variable: group size

547 \* lower grade taxa scored 1; middle and upper grade taxa scored 2

548

549

550

551



**Figure 1**

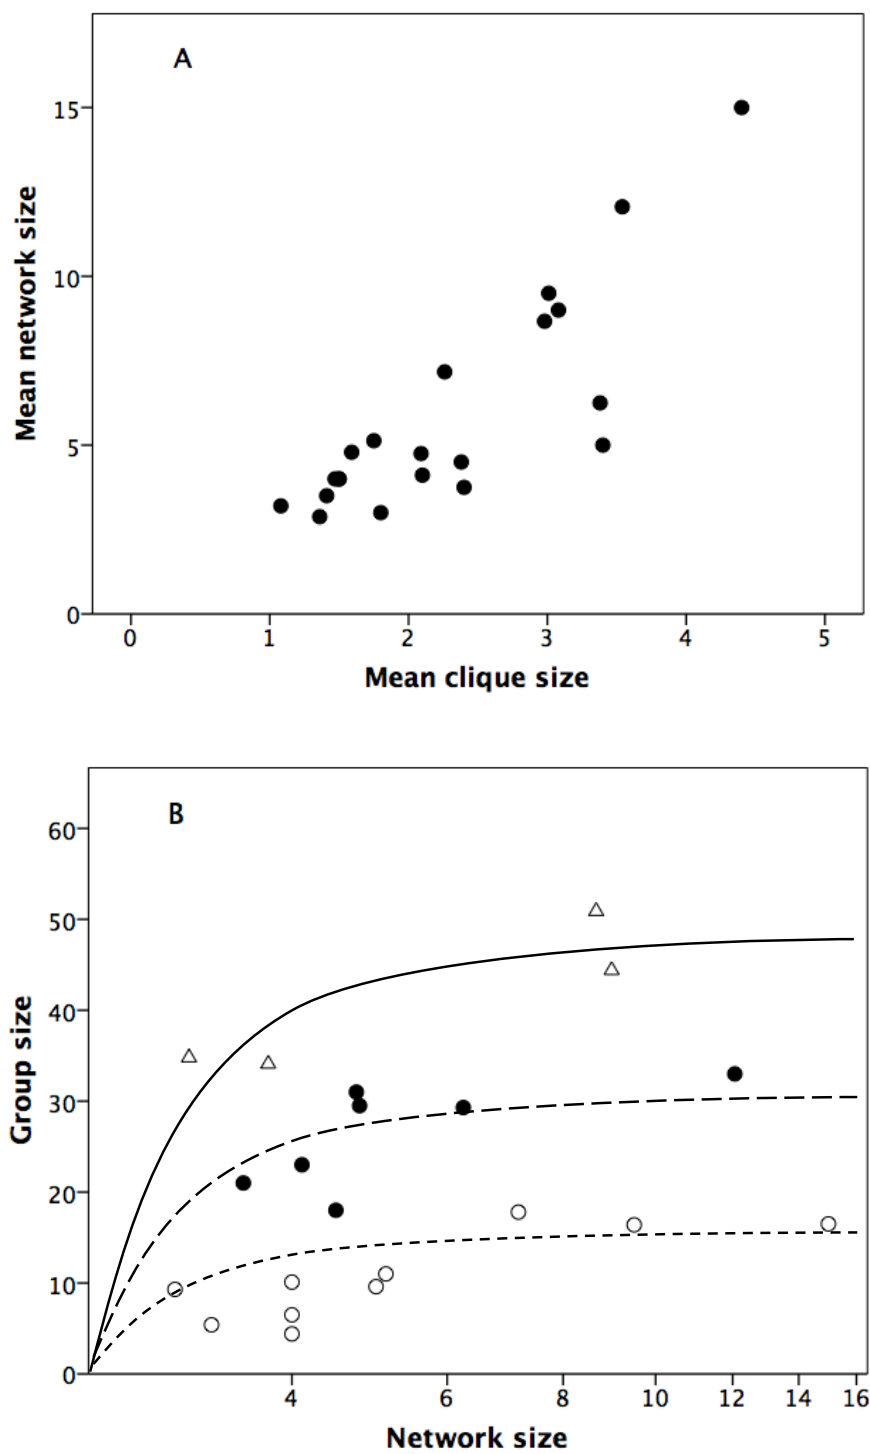

**Figure 2**

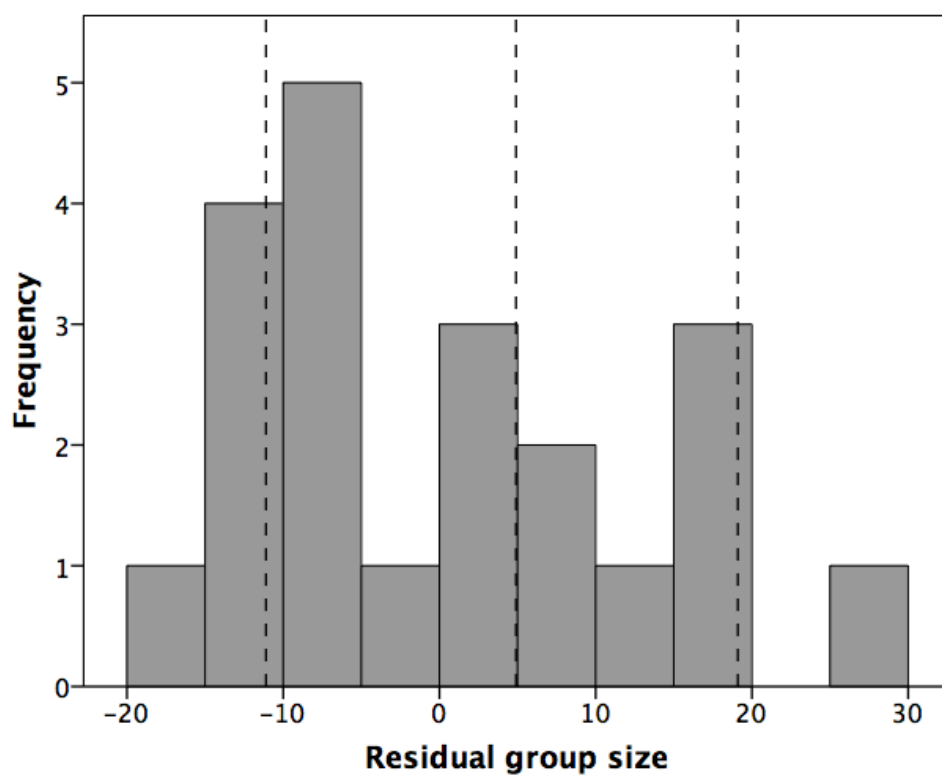

**Figure 3**

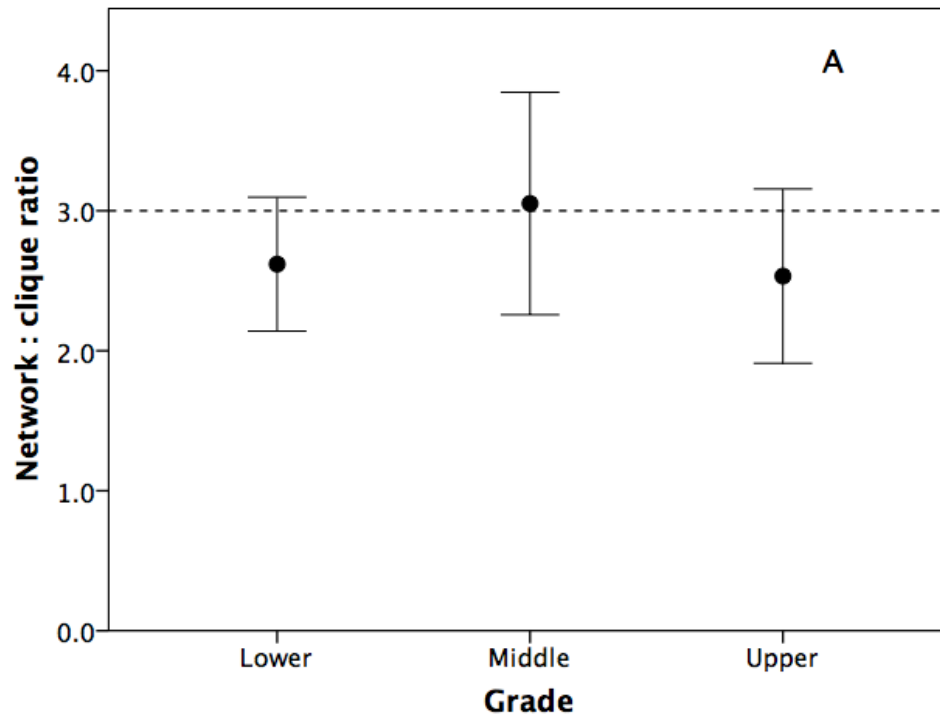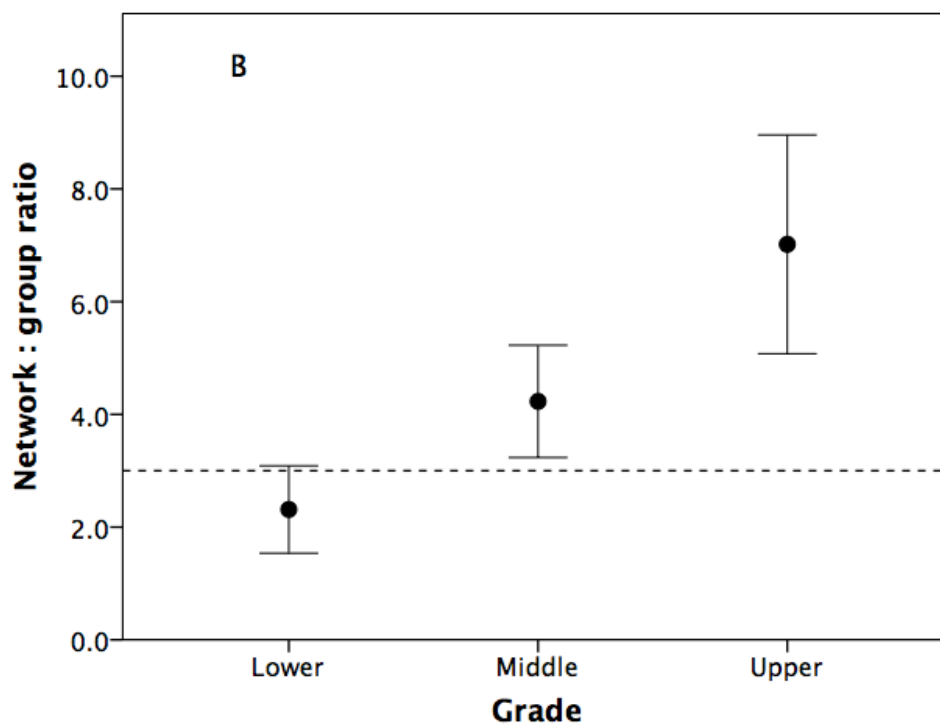

**Figure 4**

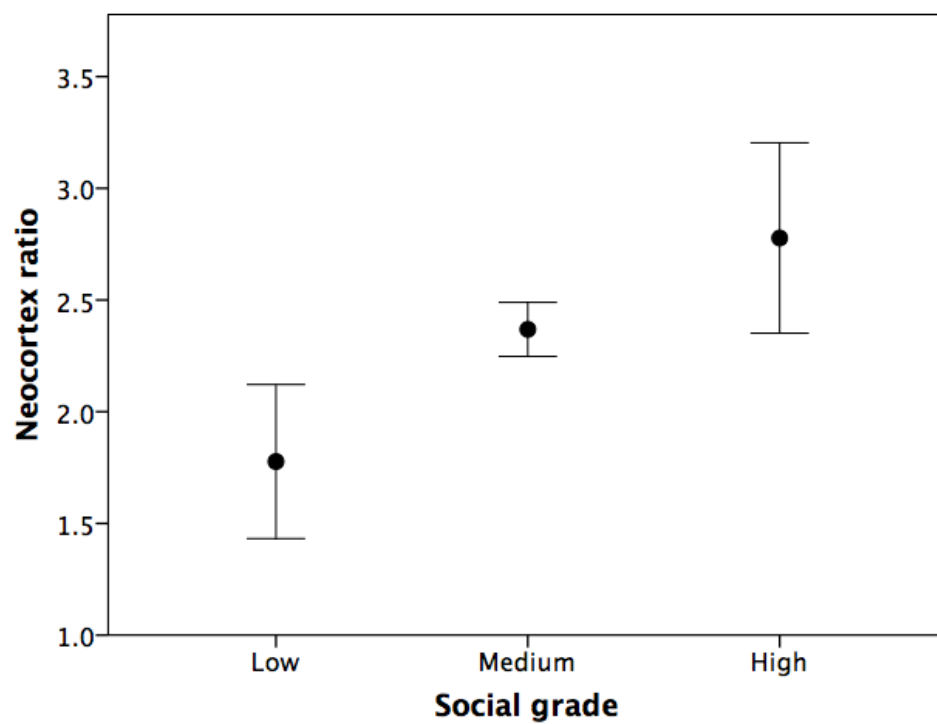

**Figure 5**

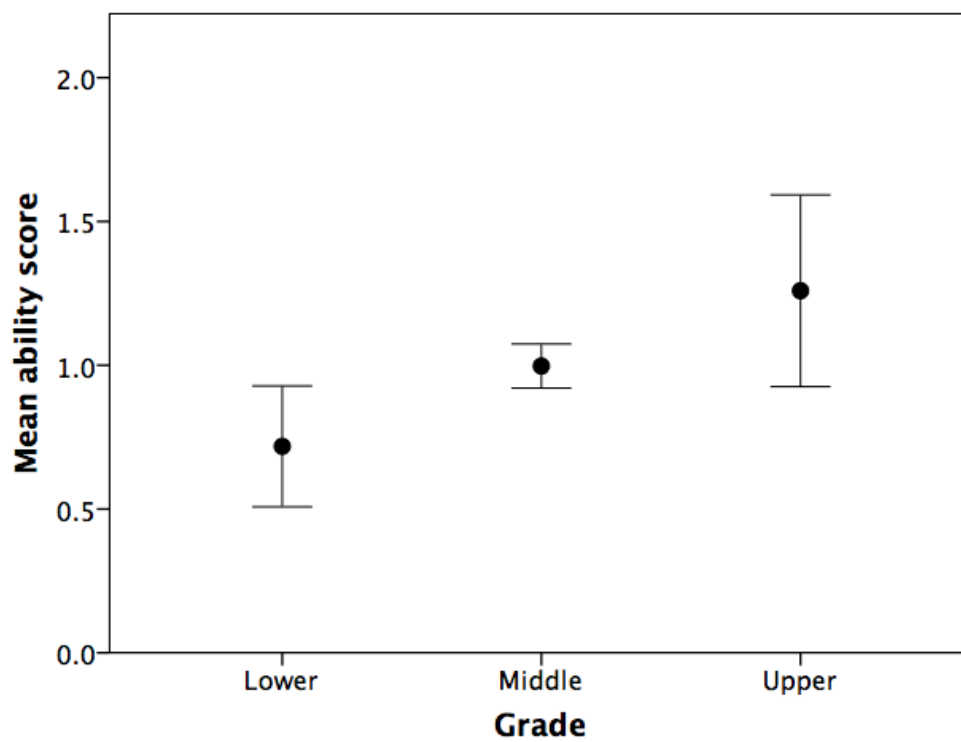

**Figure 6**

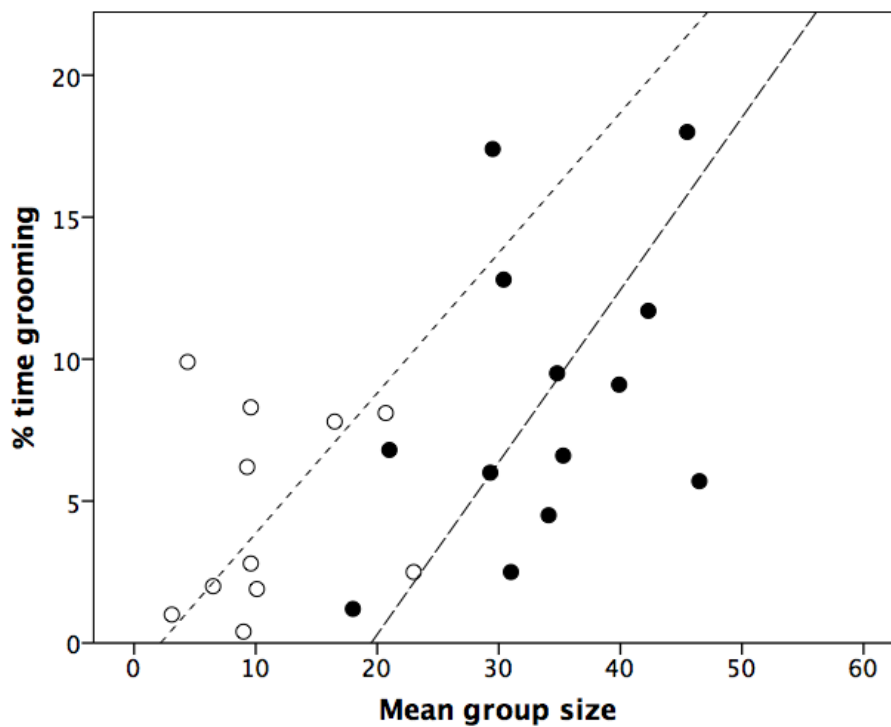

Source: http://biorxiv.org/content/10.1101/354068v1.full.pdf
